# Supplementary material
Source: HighWire-hosted journal article supplement (https://www.cmaj.ca/highwire/filestream/150536/field_highwire_adjunct_files/2/230816-res-3-at.pdf)
Supplement: 230816-res-3-at.pdf [file 230816-res-3-at.pdf]

### Appendix 3: Sensitivity analysis

**Table 1S: Characteristics of PEM physicians who are in the most unvaccinated patient group with the largest number of unvaccinated patients (top 10%), compared to the remaining 90% of PEM physicians**

| Characteristic      |                    | Top 10th percentile<br>N=905<br>N (%) | Rest 90%<br>N=8,154<br>N (%) | TOTAL<br>N=9,059<br>N (%) | Standardized Difference |
|---------------------|--------------------|---------------------------------------|------------------------------|---------------------------|-------------------------|
| Sex                 | Male               | 643 (71.0%)                           | 3,862 (47.4%)                | 4,505 (49.7%)             | 0.50                    |
|                     | Female             | 262 (29.0%)                           | 4,292 (52.6%)                | 4,554 (50.3%)             | 0.50                    |
| Training            | Outside Canada     | 426 (52.1%)                           | 1,693 (28.4%)                | 2,119 (31.3%)             | 0.50                    |
|                     | Canada             | 392 (47.9%)                           | 4,262 (71.6%)                | 4,654 (68.7%)             | 0.50                    |
| Physician age       | Median (IQR)       | 56 (49-64)                            | 49 (39-59)                   | 50 (40-60)                | 0.55                    |
| Enrollment model    | EFFS               | 463 (51.2%)                           | 2,287 (28.0%)                | 2,750 (30.4%)             | 0.49                    |
|                     | CAP                | 280 (30.9%)                           | 2,893 (35.5%)                | 3,173 (35.0%)             | 0.10                    |
|                     | FHT                | 158 (17.5%)                           | 2,876 (35.3%)                | 3,034 (33.5%)             | 0.41                    |
|                     | OGP                | <=5                                   | 98 (1.2%)                    | 102 (1.1%)                | 0.08                    |
| Physician RIO index | Urban [0-9]        | 727 (81.0%)                           | 5,892 (75.2%)                | 6,619 (75.8%)             | 0.14                    |
|                     | Small town [10-39] | 139 (15.5%)                           | 1,359 (17.3%)                | 1,498 (17.2%)             | 0.05                    |
|                     | Rural [40+]        | 32 (3.6%)                             | 582 (7.4%)                   | 614 (7.0%)                | 0.17                    |
| Rostered patients   | Median (IQR)       | 1,968 (1,649-2,395)                   | 939 (657-1,266)              | 1,000 (691-1,386)         | 2.10                    |
| 2+ vaccine doses    | Median (IQR)       | 79 (74-83)                            | 87 (84-90)                   | 86 (83-90)                | 1.59                    |
| 1 vaccine dose      | Median (IQR)       |                                       |                              |                           |                         |

EFFS - Enhanced-Fee-For Service

CAP- Capitation

FHT - Family Health Team

OGP - Other primary care model

**Table 2S: Characteristics of unvaccinated rostered patients aged 12 years and older whose PEM physicians are in the most unvaccinated patient group (top 10%), compared to the remaining 90% of PEM physicians**

| Characteristics              |              | Top 10th percentile | Rest 90%          | TOTAL                | Standardized Diff |
|------------------------------|--------------|---------------------|-------------------|----------------------|-------------------|
|                              |              | N=1,905,237         | N=7,862,083       | N=9,767,320          |                   |
| <b>Demographic</b>           |              |                     |                   |                      |                   |
| Age                          | Mean ± SD    | 45.7 ± 19.7         | 48.7 ± 20.3       | 48.1 ± 20.2          | 0.15              |
|                              | Median (IQR) | 45 (30-61)          | 49 (32-64)        | 48 (32-64)           | 0.2               |
| Patient age                  | 12-19        | 208,340<br>(10.9%)  | 692,190 (8.8%)    | 900,530 (9.2%)       | 0.07              |
|                              | 20-34        | 412,549<br>(21.7%)  | 1,550,036 (19.7%) | 1,962,585<br>(20.1%) | 0.05              |
|                              | 35-64        | 918,130<br>(48.2%)  | 3,678,232 (46.8%) | 4,596,362<br>(47.1%) | 0.03              |
|                              | 65+          | 366,218<br>(19.2%)  | 1,941,625 (24.7%) | 2,307,843<br>(23.6%) | 0.13              |
| Sex                          | Male         | 922,780<br>(48.4%)  | 3,684,929 (46.9%) | 4,607,709<br>(47.2%) | 0.03              |
|                              | Female       | 982,457<br>(51.6%)  | 4,177,154 (53.1%) | 5,159,611<br>(52.8%) | 0.03              |
| Immigrated in last 10 years  | Yes          | 163,896 (8.6%)      | 318,058 (4.0%)    | 481,954 (4.9%)       | 0.19              |
| <b>Marginalization Index</b> |              |                     |                   |                      |                   |
| Instability Quintile         | [1] Lowest   | 504,011<br>(26.6%)  | 1,722,818 (22.1%) | 2,226,829<br>(22.9%) | 0.11              |
|                              | [2]          | 351,806<br>(18.6%)  | 1,568,893 (20.1%) | 1,920,699<br>(19.8%) | 0.04              |
|                              | [3]          | 331,708<br>(17.5%)  | 1,486,401 (19.0%) | 1,818,109<br>(18.7%) | 0.04              |
|                              | [4]          | 316,451<br>(16.7%)  | 1,392,381 (17.8%) | 1,708,832<br>(17.6%) | 0.03              |

|                           |             |                    |                   |                      |      |
|---------------------------|-------------|--------------------|-------------------|----------------------|------|
| Deprivation Quintile      | [5] Highest | 389,574<br>(20.6%) | 1,639,846 (21.0%) | 2,029,420<br>(20.9%) | 0.01 |
|                           | [1] Lowest  | 349,659<br>(18.5%) | 1,991,292 (25.5%) | 2,340,951<br>(24.1%) | 0.17 |
|                           | [2]         | 380,128<br>(20.1%) | 1,747,585 (22.4%) | 2,127,713<br>(21.9%) | 0.06 |
|                           | [3]         | 383,098<br>(20.2%) | 1,497,273 (19.2%) | 1,880,371<br>(19.4%) | 0.03 |
|                           | [4]         | 374,379<br>(19.8%) | 1,348,792 (17.3%) | 1,723,171<br>(17.8%) | 0.06 |
| Dependency Quintile       | [5] Highest | 406,286<br>(21.5%) | 1,225,397 (15.7%) | 1,631,683<br>(16.8%) | 0.15 |
|                           | [1] Lowest  | 590,564<br>(31.2%) | 2,027,772 (26.0%) | 2,618,336<br>(27.0%) | 0.12 |
|                           | [2]         | 398,204<br>(21.0%) | 1,550,951 (19.9%) | 1,949,155<br>(20.1%) | 0.03 |
|                           | [3]         | 321,683<br>(17.0%) | 1,376,259 (17.6%) | 1,697,942<br>(17.5%) | 0.02 |
|                           | [4]         | 303,914<br>(16.0%) | 1,344,899 (17.2%) | 1,648,813<br>(17.0%) | 0.03 |
| Ethnic Diversity Quintile | [5] Highest | 279,185<br>(14.7%) | 1,510,458 (19.3%) | 1,789,643<br>(18.4%) | 0.12 |
|                           | [1] Lowest  | 225,599<br>(11.9%) | 1,354,516 (17.3%) | 1,580,115<br>(16.3%) | 0.15 |
|                           | [2]         | 265,513<br>(14.0%) | 1,401,585 (17.9%) | 1,667,098<br>(17.2%) | 0.11 |
|                           | [3]         | 274,296<br>(14.5%) | 1,483,996 (19.0%) | 1,758,292<br>(18.1%) | 0.12 |
|                           | [4]         | 365,453<br>(19.3%) | 1,669,028 (21.4%) | 2,034,481<br>(21.0%) | 0.05 |

|                                                                     |                               |                      |                   |                      |      |
|---------------------------------------------------------------------|-------------------------------|----------------------|-------------------|----------------------|------|
| Income quintile                                                     | [5] Highest                   | 762,689<br>(40.3%)   | 1,901,214 (24.3%) | 2,663,903<br>(27.5%) | 0.35 |
|                                                                     | [1] Lowest oncome             | 401,559<br>(21.1%)   | 1,310,551 (16.7%) | 1,712,110<br>(17.6%) | 0.11 |
|                                                                     | [2]                           | 399,445<br>(21.0%)   | 1,475,992 (18.8%) | 1,875,437<br>(19.2%) | 0.06 |
|                                                                     | [3]                           | 416,391<br>(21.9%)   | 1,581,613 (20.2%) | 1,998,004<br>(20.5%) | 0.04 |
|                                                                     | [4]                           | 372,371<br>(19.6%)   | 1,689,718 (21.5%) | 2,062,089<br>(21.2%) | 0.05 |
| <b>Comorbidity (ACG)</b>                                            | [5] Highest income            | 310,702<br>(16.3%)   | 1,785,385 (22.8%) | 2,096,087<br>(21.5%) | 0.16 |
|                                                                     | No/low comorbidity<br>[0-4]   | 1,013,968<br>(53.2%) | 4,205,456 (53.5%) | 5,219,424<br>(53.4%) | 0.01 |
|                                                                     | Moderate<br>comorbidity [5-9] | 672,175<br>(35.3%)   | 2,765,432 (35.2%) | 3,437,607<br>(35.2%) | 0.00 |
|                                                                     | High comorbidity<br>[10+]     | 219,094<br>(11.5%)   | 891,195 (11.3%)   | 1,110,289<br>(11.4%) | 0.01 |
| <b>Patient care and quality of care measures</b>                    |                               |                      |                   |                      |      |
| Continuity of care in<br>last 2 years                               | Median (IQR)                  | 97 (76-100)          | 94 (75-100)       | 94 (75-100)          | 0.05 |
| Any virtual visits<br>(telephone) in last 6<br>months               | Yes                           | 904,697<br>(47.5%)   | 3,820,674 (48.6%) | 4,725,371<br>(48.4%) | 0.02 |
| Any in-person visits<br>(office) in last 8 months                   | Yes                           | 1,034,227<br>(54.3%) | 4,169,450 (53.0%) | 5,203,677<br>(53.3%) | 0.0  |
| Any colorectal cancer<br>screening for patients<br>aged 50-74 years | Yes                           | 377,214<br>(56.3%)   | 1,957,864 (64.2%) | 2,335,078<br>(62.8%) | 0.16 |

|                                                                              |             |                   |                   |                   |      |
|------------------------------------------------------------------------------|-------------|-------------------|-------------------|-------------------|------|
| At least 1 pap test for women aged 21-69 years in last 42 months             | Yes         | 326,533 (44.5%)   | 1,504,522 (49.6%) | 1,831,055 (48.6%) | 0.04 |
| At least 1 cholesterol (LDL) test for diabetic patients in last 2 years      | Yes         | 191,937 (81.6%)   | 739,881 (79.9%)   | 931,818 (80.3%)   | 0.04 |
| At least 3 HbA1c tests for diabetic patients in last 2 years                 | Yes         | 150,029 (63.8%)   | 605,841 (65.5%)   | 755,870 (65.1%)   | 0.03 |
| <b>COVID-19 Vaccination</b>                                                  |             |                   |                   |                   |      |
| Percent fully vaccinated (2+ doses) by age group on Nov 2 <sup>nd</sup> 2021 | 12-17       | 114,309 (72.3%)   | 410,281 (79.8%)   | 524,590 (78.0%)   | 0.18 |
|                                                                              | 18-39       | 461,758 (74.5%)   | 1,846,824 (80.0%) | 2,308,582 (78.9%) | 0.13 |
|                                                                              | 40-64       | 625,629 (82.2%)   | 2,705,865 (87.3%) | 3,331,494 (86.3%) | 0.14 |
|                                                                              | 65-79       | 241,837 (86.6%)   | 1,325,631 (92.0%) | 1,567,468 (91.1%) | 0.18 |
|                                                                              | 80+         | 74,332 (85.6%)    | 458,924 (91.7%)   | 533,256 (90.8%)   | 0.19 |
|                                                                              | Total (12+) | 1,517,865 (79.7%) | 6,747,525 (85.8%) | 8,265,390 (84.6%) | 0.16 |

Note: Some of the variable specific totals will not add up to overall total because of inclusion-exclusion criteria and/or missing data

**Table S3: Three random effects logistic models describing the association between characteristics of patients and physicians being unvaccinated, within physicians who had the highest percentage of unvaccinated patients (top 10th percentile) versus the rest 90%, and all physicians**

|                                   |                | Top 10th Percentile |              |              |        | Rest 90%   |              |              |        | Total      |              |              |        |
|-----------------------------------|----------------|---------------------|--------------|--------------|--------|------------|--------------|--------------|--------|------------|--------------|--------------|--------|
| Variable                          | Label          | Odds Ratio          | 95% CI Lower | 95% CI Upper | P      | Odds Ratio | 95% CI Lower | 95% CI Upper | P      | Odds Ratio | 95% CI Lower | 95% CI Upper | P      |
| Patient age group                 | a. 12-17       | 2.409               | 2.361        | 2.459        | <.0001 | 2.333      | 2.312        | 2.353        | <.0001 | 2.342      | 2.323        | 2.361        | <.0001 |
|                                   | b. 18-36       | 2.168               | 2.135        | 2.202        | <.0001 | 2.492      | 2.476        | 2.509        | <.0001 | 2.440      | 2.425        | 2.455        | <.0001 |
|                                   | c. 37-65       | 1.442               | 1.421        | 1.462        | <.0001 | 1.562      | 1.552        | 1.572        | <.0001 | 1.542      | 1.533        | 1.551        | <.0001 |
|                                   | d. 66+         | 1.000               | .            | .            | .      | 1.000      | .            | .            | .      | 1.000      | .            | .            | .      |
| Patient sex                       | a. Female      | 0.989               | 0.980        | 0.999        | 0.0251 | 0.957      | 0.953        | 0.961        | <.0001 | 0.962      | 0.958        | 0.966        | <.0001 |
|                                   | b. Male        | 1.000               | .            | .            | .      | 1.000      | .            | .            | .      | 1.000      | .            | .            | .      |
| Patient Income quintile           | a. [1] Lowest  | 1.517               | 1.490        | 1.544        | <.0001 | 1.752      | 1.740        | 1.764        | <.0001 | 1.718      | 1.706        | 1.729        | <.0001 |
|                                   | b. [2]         | 1.311               | 1.288        | 1.334        | <.0001 | 1.428      | 1.419        | 1.438        | <.0001 | 1.416      | 1.408        | 1.425        | <.0001 |
|                                   | c. [3]         | 1.195               | 1.174        | 1.217        | <.0001 | 1.267      | 1.258        | 1.275        | <.0001 | 1.261      | 1.254        | 1.269        | <.0001 |
|                                   | d. [4]         | 1.086               | 1.067        | 1.106        | <.0001 | 1.144      | 1.137        | 1.152        | <.0001 | 1.139      | 1.132        | 1.146        | <.0001 |
|                                   | e. [5] Highest | 1.000               | .            | .            | .      | 1.000      | .            | .            | .      | 1.000      | .            | .            | .      |
| Patient Ethnic Diversity Quintile | a. [1] Lowest  | 1.000               | .            | .            | .      | 1.000      | .            | .            | .      | 1.000      | .            | .            | .      |
|                                   | b. [2]         | 1.063               | 1.042        | 1.084        | <.0001 | 1.007      | 1.000        | 1.015        | 0.0452 | 1.014      | 1.007        | 1.020        | <.0001 |
|                                   | c. [3]         | 1.112               | 1.088        | 1.136        | <.0001 | 0.991      | 0.983        | 0.999        | 0.0268 | 1.005      | 0.998        | 1.013        | 0.1680 |
|                                   | d. [4]         | 1.145               | 1.121        | 1.171        | <.0001 | 1.022      | 1.013        | 1.030        | <.0001 | 1.037      | 1.029        | 1.045        | <.0001 |
|                                   | e. [5] Highest | 1.130               | 1.105        | 1.156        | <.0001 | 1.007      | 0.998        | 1.016        | 0.1082 | 1.021      | 1.012        | 1.029        | <.0001 |

|                             |                         |       |       |       |        |       |       |       |        |       |       |       |        |
|-----------------------------|-------------------------|-------|-------|-------|--------|-------|-------|-------|--------|-------|-------|-------|--------|
| Patient Comorbidity (ACG)   | a. No/low comorbidity   | 1.973 | 1.939 | 2.007 | <.0001 | 1.817 | 1.802 | 1.831 | <.0001 | 1.844 | 1.830 | 1.857 | <.0001 |
|                             | b. Moderate comorbidity | 1.112 | 1.092 | 1.132 | <.0001 | 1.052 | 1.043 | 1.061 | <.0001 | 1.063 | 1.055 | 1.071 | <.0001 |
|                             | c. High comorbidity     | 1.000 | .     | .     | .      | 1.000 | .     | .     | .      | 1.000 | .     | .     | .      |
| RIO Score Group - Patient   | a. Urban                | 1.000 | .     | .     | .      | 1.000 | .     | .     | .      | 1.000 | .     | .     | .      |
|                             | b. Small town           | 1.277 | 1.252 | 1.303 | <.0001 | 1.252 | 1.243 | 1.262 | <.0001 | 1.257 | 1.248 | 1.265 | <.0001 |
|                             | c. Rural                | 1.332 | 1.287 | 1.379 | <.0001 | 1.489 | 1.472 | 1.507 | <.0001 | 1.474 | 1.457 | 1.490 | <.0001 |
| Immigrated in last 10 years | a. Yes                  | 0.969 | 0.951 | 0.988 | 0.0011 | 0.994 | 0.985 | 1.004 | 0.2450 | 0.989 | 0.981 | 0.998 | 0.0119 |
|                             | b. No                   | 1.000 | .     | .     | .      | 1.000 | .     | .     | .      | 1.000 | .     | .     | .      |
| Physician age group         | a. <45                  | 1.000 | .     | .     | .      | 1.000 | .     | .     | .      | 1.000 | .     | .     | .      |
|                             | b. 45-64                | 1.015 | 0.961 | 1.073 | 0.5859 | 1.071 | 1.054 | 1.088 | <.0001 | 1.068 | 1.051 | 1.084 | <.0001 |
|                             | c. 65-74                | 1.099 | 1.025 | 1.179 | 0.0083 | 1.093 | 1.067 | 1.121 | <.0001 | 1.098 | 1.073 | 1.124 | <.0001 |
|                             | d. 75+                  | 1.124 | 1.023 | 1.234 | 0.0149 | 1.255 | 1.194 | 1.320 | <.0001 | 1.228 | 1.175 | 1.283 | <.0001 |
| Physician sex               | a. Female               | 1.060 | 1.013 | 1.109 | 0.0118 | 0.916 | 0.902 | 0.929 | <.0001 | 0.927 | 0.914 | 0.940 | <.0001 |
|                             | b. Male                 | 1.000 | .     | .     | .      | 1.000 | .     | .     | .      | 1.000 | .     | .     | .      |
| Enrolment model             | a. CAP                  | 1.000 | .     | .     | .      | 1.000 | .     | .     | .      | 1.000 | .     | .     | .      |
|                             | b. FHT                  | 0.881 | 0.828 | 0.939 | <.0001 | 0.965 | 0.948 | 0.982 | <.0001 | 0.959 | 0.943 | 0.975 | <.0001 |
|                             | c. OGP                  | 0.798 | 0.660 | 0.966 | 0.0205 | 0.900 | 0.836 | 0.968 | 0.0047 | 0.880 | 0.821 | 0.943 | 0.0003 |
|                             | d. EFFS                 | 1.088 | 1.034 | 1.146 | 0.0012 | 1.138 | 1.117 | 1.159 | <.0001 | 1.135 | 1.116 | 1.155 | <.0001 |
| Physicians with top 10th    | a. Top 10th percentile  |       |       |       |        |       |       |       |        | 2.234 | 2.180 | 2.288 | <.0001 |

Appendix 3, as submitted by the authors. Appendix to: Shuldiner J, Green ME, Kiran T, et al. Characteristics of primary care practices by proportion of patients unvaccinated against SARS-CoV-2: a cross-sectional cohort study. *CMAJ* 2024. doi: 10.1503/cmaj.230816. Copyright © 2024 The Author(s) or their employer(s). To receive this resource in an accessible format, please contact us at [cmajgroup@cmaj.ca](mailto:cmajgroup@cmaj.ca).

|                                                            |                               |  |  |  |  |  |  |  |  |       |   |   |   |
|------------------------------------------------------------|-------------------------------|--|--|--|--|--|--|--|--|-------|---|---|---|
| percentile of largest proportions of unvaccinated patients |                               |  |  |  |  |  |  |  |  |       |   |   |   |
|                                                            | b. Rest 90th percentile (ref) |  |  |  |  |  |  |  |  | 1.000 | . | . | . |

ACG= Adjusted clinical group

FFS - Enhanced-Fee-For Service

CAP- Capitation

FHT - Family Health Team

OGP - Other primary care model
